# Supplementary material for: Explainable brain age prediction: a comparative evaluation of morphometric and deep learning pipelines
Source: Springer Nature journal article supplement (doi:10.1186/s40708-024-00244-9), 2024-12-01
Supplement: 40708_2024_244_MOESM1_ESM.pdf [file 40708_2024_244_MOESM1_ESM.pdf]

## 8 Supplementary Material

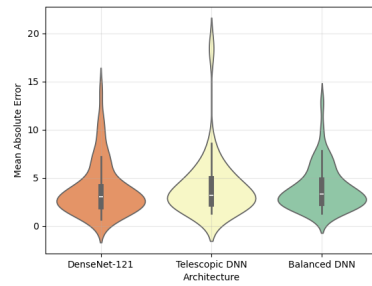

(a) LOSO results.

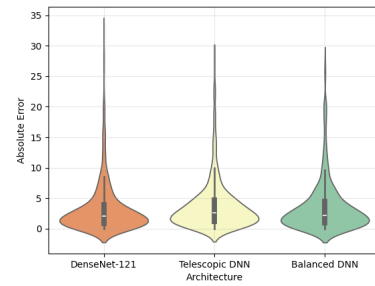

(b) Independent test.

**Fig. 13:** Violin plots illustrating the distribution of MAE scores across the three architectures for both LOSO validation and independent test.

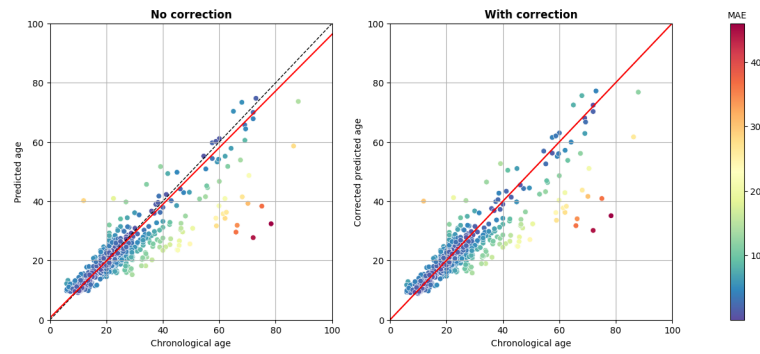

(a) SFCN

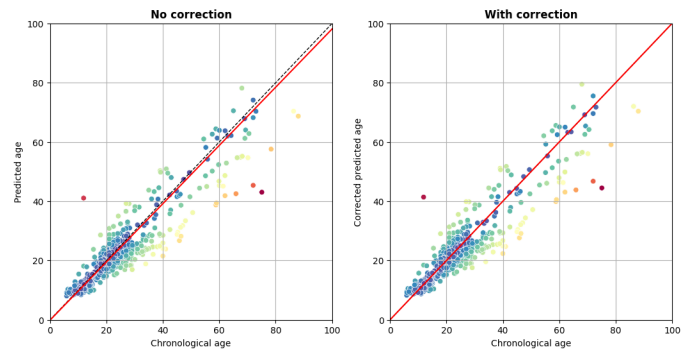

(b) ResNet-18

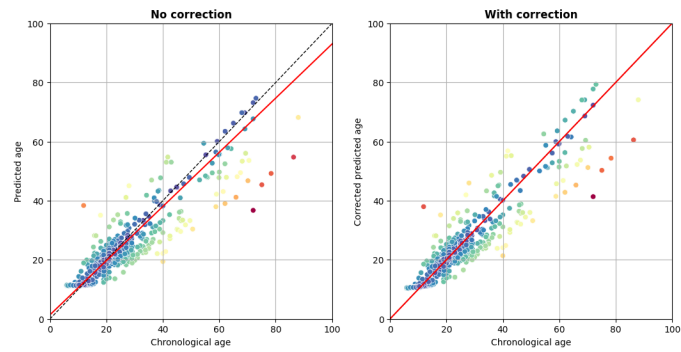

(c) AlexNet

**Fig. 14:** Predictions on the test set for the three CNN models in the predicted age vs. chronological age plane. Panel (a) shows the SFCN model, panel (b) depicts the ResNet-18 model and panel (c) shows the AlexNet model. In all the graphs, data points are scattered around the trend line, with larger deviations observed at older ages. The red line represents the regression line derived from the training set predictions. The color of the points indicates the MAE, with a gradient ranging from blue (low error) to red (high error).
